# Supplementary material for: Nut consumption in relation to all-cause and cause-specific mortality: a meta-analysis 18 prospective studies
Source: Royal Society of Chemistry journal article supplement (doi:10.1039/c7fo00915a), 2017-01-01
Supplement: c7fo00915a2.pdf [file c7fo00915a2.pdf]

## Nut consumption in relation to all-cause and cause-specific mortality: a meta-analysis 18 prospective studies

Guo-Chong Chen, Ru Zhang, Miguel A. Martínez-González, Zeng-Li Zhang, Marialaura Bonaccio, Rob M. van Dam\*, Li-Qiang Qin\*

### Supplementary Tables 1-7

|                              |                                                                                                                                                                       |
|------------------------------|-----------------------------------------------------------------------------------------------------------------------------------------------------------------------|
| <b>Supplementary Table 1</b> | Characteristics of included prospective studies on nut consumption and total and cause-specific mortality                                                             |
| <b>Supplementary Table 2</b> | The quality of included studies assessed by the Newcastle Ottawa Scale                                                                                                |
| <b>Supplementary Table 3</b> | Subgroup analysis for the association of nut consumption with all-cause mortality, high vs. low consumption                                                           |
| <b>Supplementary Table 4</b> | Subgroup analysis for the associations of nut consumption with cardiovascular disease and cancer mortality, high vs. low consumption                                  |
| <b>Supplementary Table 5</b> | Subgroup analysis for the associations of nut consumption with coronary heart disease and stroke mortality, high vs. low consumption                                  |
| <b>Supplementary Table 6</b> | Regression coefficients between frequency of nut consumption and background risk factors                                                                              |
| <b>Supplementary Table 7</b> | Sensitivity analyses of nut consumption (high vs. low) and risk of all-cause mortality by regression coefficients between nut consumption and background risk factors |

**Supplementary Table 1.** Characteristics of included prospective studies on nut consumption and total and cause-specific mortality

| Author, year (Country)                  | Study name, duration                                | Participants             | Type of nut                                                                                       | Diet assessment                | No. of death                                                    | RR (95% CI)                                                                                        | Nut intake      | Statistical adjustment                                                                                                                                                                                                                                                                                                           |
|-----------------------------------------|-----------------------------------------------------|--------------------------|---------------------------------------------------------------------------------------------------|--------------------------------|-----------------------------------------------------------------|----------------------------------------------------------------------------------------------------|-----------------|----------------------------------------------------------------------------------------------------------------------------------------------------------------------------------------------------------------------------------------------------------------------------------------------------------------------------------|
| Mann, 1997 <sup>1</sup> (UK)            | Oxford Vegetarian Study, 13.3 yr                    | 10 802 M/F aged 16-79 yr | Nuts (not specified)                                                                              | Self-reported FFQ              | Total:392<br>CHD:64                                             | 0.99 (0.72-1.38)<br>0.87 (0.45-1.68)                                                               | ≥5 vs.<1 ser/wk | Age, sex, smoking, and social class.                                                                                                                                                                                                                                                                                             |
| Fraser, 1997 <sup>2</sup> (USA)         | Adventists Health Study (non-Hispanic White), 12 yr | M/F aged ≥85 yr          | Nuts (not specified)                                                                              | Self-reported FFQ              | Total:1387<br>CHD:364                                           | 0.75 (0.65-0.86)<br>0.55 (0.42-0.73)                                                               | ≥5 vs.<1 ser/wk | Sex, smoking, physical activity, diabetes, and intakes of fruit, bread, donut, sweet dessert, beef, and fish.                                                                                                                                                                                                                    |
| Fraser, 1997 <sup>3</sup> (USA)         | Adventists Health Study (black), 9yr                | 1668 M/F aged≥25 yr      | Nuts (except those used in recipes)                                                               | Self-reported FFQ              | Total:153                                                       | 0.60 (0.30-1.00)                                                                                   | ≥5 vs.<1 ser/wk | Age, smoking and physical activity.                                                                                                                                                                                                                                                                                              |
| Yochum, 2000 <sup>4</sup> (USA)         | Iowa Women's Health Study, 9 yr                     | 34 492 F aged 55-69 yr   | Nuts and seeds                                                                                    | Self-reported FFQ              | Stroke:215                                                      | 0.73 (0.41-1.29)                                                                                   | >4 vs. 0 ser/mo | Age, BMI, smoking, physical activity, waist/hip ratio, BP, diabetes, estrogen use, education, marital status, and intakes of energy, alcohol, cholesterol, saturated fat, fish, vitamin C, carotenoids, dietary fiber, and whole grains.                                                                                         |
| Blomhoff, 2006 <sup>5</sup> (USA)       | Iowa Women's Health Study, 15 yr                    | 31 778 F aged 55-69 yr   | Nuts and peanut butter                                                                            | Self-reported FFQ              | Total:5451<br>CVD:1675<br>CHD:948                               | 0.89 (0.81-0.99)<br>0.72 (0.60-0.88)<br>0.71 (0.55-0.91)                                           | ≥5 vs. 0 ser/wk | Age, education, physical activity, BMI, waist/hip ratio, estrogen use, multivitamin supplements, and intakes of alcohol, energy, whole or refined grain, red meat, fish, seafood, and fruit and vegetables.                                                                                                                      |
| Guasch-Ferré, 2013 <sup>6</sup> (Spain) | PREDIMED Study, 4.8 yr                              | 7216 M/F aged 55-80 yr   | Nuts (peanuts, almonds, hazelnut, walnut, pine nut, pistachios, Brazil nut, macadamia and cashew) | Interview-based FFQ, validated | Total:323<br>CVD:81<br>CHD:15*<br>Stroke:24*<br>Cancer:130      | 0.61 (0.45-0.83)<br>0.45 (0.25-0.81)<br>0.20 (0.04-1.06)*<br>0.40 (0.12-1.37)*<br>0.60 (0.37-0.98) | >3 vs. 0 ser/wk | Age, sex, BMI, smoking, education, physical activity, intervention group, recruitment center, history of diabetes or hypercholesterolemia, antidiabetic medication use, antihypertensive medication use, statins use, Mediterranean diet adherence, and intakes of energy, alcohol, fruit, vegetables, red meat, eggs, and fish. |
| Bao, 2013 <sup>7</sup> (USA)            | Nurses' Health Study, 30 yr                         | 76 464 F aged 30-55 yr   | Nuts (peanuts and other nuts)                                                                     | Self-reported FFQ, validated   | Total:16200<br>CVD:3086<br>HD:2208<br>Stroke:878<br>Cancer:6535 | 0.84 (0.77-0.92)<br>0.82 (0.66-1.01)<br>0.72 (0.55-0.94)<br>1.05 (0.73-1.52)<br>0.94 (0.82-1.09)   | ≥5 vs. 0 ser/wk | Age, race, BMI, physical activity, smoking, physical examination, menopausal status, hormone use, multivitamin use, current aspirin use, family history of diabetes or MI or cancer, history of diabetes or hypertension or hypercholesterolemia, and intake of energy, alcohol, red and processed meat, fruit, and vegetables.  |
| Bao, 2013 <sup>7</sup> (USA)            | Health Professionals Follow-up Study, 24 yr         | 42 498 M aged 40-75 yr   | Nuts (peanuts and other nuts)                                                                     | Self-reported FFQ, validated   | Total:11229<br>CVD:3385<br>HD:2698<br>Stroke:687<br>Cancer:3758 | 0.82 (0.76-0.88)<br>0.73 (0.64-0.83)<br>0.71 (0.61-0.83)<br>0.78 (0.58-1.06)<br>0.86 (0.75-0.98)   | ≥5 vs. 0 ser/wk | Age, race, BMI, physical activity, smoking, physical examination, multivitamin use, current aspirin use, family history of diabetes or MI or cancer, history of diabetes or hypertension or hypercholesterolemia, and intake of energy, alcohol, red/processed meat, fruit, and vegetables,                                      |

|                                                     |                                         |                                                                            |                                                                                                                        |                              |                                                                                                                                                                                                                                  |                                                                                                                                                                                                                          |                                  |                                                                                                                                                                                                                                                                                                                                                                                     |
|-----------------------------------------------------|-----------------------------------------|----------------------------------------------------------------------------|------------------------------------------------------------------------------------------------------------------------|------------------------------|----------------------------------------------------------------------------------------------------------------------------------------------------------------------------------------------------------------------------------|--------------------------------------------------------------------------------------------------------------------------------------------------------------------------------------------------------------------------|----------------------------------|-------------------------------------------------------------------------------------------------------------------------------------------------------------------------------------------------------------------------------------------------------------------------------------------------------------------------------------------------------------------------------------|
| Fernandez-Montero, 2014 <sup>8</sup><br>(Spain)     | SUN Cohort Study, 5 yr                  | 17 184 M/F                                                                 | Nuts (peanuts, walnut, almonds, and hazelnut)                                                                          | Self-reported FFQ, validated | Total:119<br>CVD:19*<br>Cancer:51*                                                                                                                                                                                               | 0.44 (0.23-0.86)<br>0.24 (0.04-1.54)*<br>0.86 (0.35-2.08)*                                                                                                                                                               | ≥2 ser/wk vs. never/almost never | Age, sex, BMI, smoking, alcohol intake, physical activity, adherence to the Mediterranean diet, use of special diets, marital status, history of hypercholesterolemia or hypertension or CVD or diabetes or cancer, and length of TV watching,.                                                                                                                                     |
| Sluik, 2014 <sup>9</sup><br>(10 European countries) | EPIC Study, 9.9 yr                      | 265 295 M/F aged 35-70 yr                                                  | Nuts and seeds                                                                                                         | Self-reported FFQ, validated | Total:830 (diabetic)<br>12135 (non-diabetic)                                                                                                                                                                                     | 0.94 (0.90-0.97)<br>0.99 (0.98-1.00)                                                                                                                                                                                     | Per 1 g/d                        | Age, sex, smoking, alcohol, physical activity study center, prevalence of HD, cancer or stroke, education, diabetes medication use (in diabetic individuals), and underlying dietary patterns.                                                                                                                                                                                      |
| Luu, 2015 <sup>10</sup><br>(USA)                    | Southern Community Cohort Study, 5.4 yr | 71 764 M/F aged 40-79 yr                                                   | Nuts and peanut butter (total and causes-specific death) /<br>Nuts only (total death) /<br>Peanut butter (total death) | Self-reported FFQ, validated | Total:6256<br>CVD:1309 (African)<br>CVD:548 (European)<br>IHD:501 (African)<br>IHD:292 (European)<br>IS:96 (African)<br>IS:25 (European)<br>HS:75 (African)<br>HS:21(European)<br>Cancer:1052 (African)<br>Cancer:499 (European) | 0.79 (0.73-0.86)<br>0.77 (0.63-0.92)<br>0.62 (0.46-0.84)<br>0.62 (0.45-0.85)<br>0.60 (0.39-0.92)<br>0.89 (0.45-1.74)<br>0.47 (0.12-1.76)<br>1.37 (0.67-2.80)<br>0.62 (0.12-3.26)<br>0.74 (0.60-0.92)<br>0.93 (0.68-1.29) | ≥18.45 vs.< 0.95 g/d             | Age, sex, BMI, smoking, physical activity, race, education, occupation, income, marital status, vitamin supplement, Charlson Comorbidity Index, metabolic conditions (≥1 of the following conditions: history of hypertension or HD, diabetes mellitus, BMI of≥30, or hypercholesterolemia), and intakes of energy, alcohol, red meat, chicken and duck, seafood, fruit, vegetable. |
| Luu, 2015 <sup>10</sup><br>(China)                  | Shanghai Men's Health Study, 6.5 yr     | 61 123 M aged 40-74 yr                                                     | Peanuts                                                                                                                | Self-reported FFQ, validated | Total:3387<br>CVD:1117<br>IHD:306<br>IS:234<br>HS:245<br>Cancer:1492                                                                                                                                                             | 0.83 (0.75-0.91)<br>0.78 (0.66-0.93)<br>0.80 (0.58-1.11)<br>0.79 (0.54-1.14)<br>0.80 (0.55-1.16)<br>0.96 (0.83-1.11)                                                                                                     | ≥2.54 vs.< 0.14 g/d              | Age, BMI, smoking, physical activity, race, education, occupation, income, marital status, vitamin supplement, Charlson Comorbidity Index, metabolic conditions (≥1 of the following conditions: history of hypertension or HD, diabetes mellitus, BMI of≥30, unspecified dyslipidemia), and intakes of energy, alcohol, red meat, chicken and duck, seafood, fruit, and vegetable. |
| Luu, 2015 <sup>10</sup><br>(China)                  | Shanghai Women's Health Study, 12.2 yr  | 73 142 F aged 40-70 yr                                                     | Peanuts                                                                                                                | Self-reported FFQ, validated | Total:4757<br>CVD:1479<br>IHD:325<br>IS:354<br>HS:352<br>Cancer:2040                                                                                                                                                             | 0.83 (0.75-0.91)<br>0.72(0.61-0.86)<br>0.58(0.39-0.87)<br>0.72(0.51-1.03)<br>0.77 (0.55-1.07)<br>0.97 (0.84-1.12)                                                                                                        | ≥2.54 vs.< 0.14 g/d              | As above.                                                                                                                                                                                                                                                                                                                                                                           |
| di Giuseppe, 2015 <sup>11</sup><br>(Germany)        | EPIC-Potsdam Study, 8.3 yr              | 10 904 M and 16 644 F with a mean age of 52.5 yr and 49.2 yr, respectively | Nuts (peanuts, walnut and Brazil nut)                                                                                  | Self-reported FFQ, validated | Stroke death: 36                                                                                                                                                                                                                 | 0.31 (0.07-1.38)†                                                                                                                                                                                                        | 14.2 vs. 0 g/d                   | Age, sex, BMI, waist circumference, smoking, education, physical activity, hypertension, hyperlipidemia, diabetes, and intakes of energy, alcohol, red meat, whole-grain breads, fruit, vegetable, fish, cakes and cookies, confectionary, fried potatoes, and other beverages.                                                                                                     |

|                                                         |                                                            |                                              |                                                                          |                                       |                                                                      |                                                                                                                                 |                                                                                                   |                                                                                                                                                                                                                                                                                           |
|---------------------------------------------------------|------------------------------------------------------------|----------------------------------------------|--------------------------------------------------------------------------|---------------------------------------|----------------------------------------------------------------------|---------------------------------------------------------------------------------------------------------------------------------|---------------------------------------------------------------------------------------------------|-------------------------------------------------------------------------------------------------------------------------------------------------------------------------------------------------------------------------------------------------------------------------------------------|
| Hshieh, 2015 <sup>12</sup><br>(USA)                     | Physicians' Health Study,<br>9.6 yr                        | 20 742 M<br>with a mean<br>age of 66.6<br>yr | Nuts and peanut<br>butter                                                | Self-reported<br>FFQ                  | Total:2732<br>CVD:760<br>CAD:405<br>Stroke:142<br>Cancer:868         | 0.76 (0.64-0.89)<br>0.74 (0.55-1.02)<br>0.85 (0.56-1.28)<br>0.87 (0.66-1.15)<br>0.64 (0.32-1.30)                                | ≥5 ser/wk<br>vs.<1 ser/ wk                                                                        | Age, BMI, smoking, physical activity, prevalence of hypertension or diabetes, and intakes of energy, alcohol, saturated fat, fruit, vegetable, red meat, magnesium (total mortality), and dietary fiber (total mortality).                                                                |
| van den Brandt, 2015 <sup>13</sup><br>(the Netherlands) | Case-cohort with the<br>Netherlands Cohort<br>Study, 10 yr | 12 025 M/F<br>aged 55-69<br>yr               | Nuts and peanut<br>butter /<br>Peanuts /<br>Tree nuts /<br>Peanut butter | Self-reported<br>FFQ, validated       | Total: 8823<br>CVD: 2985<br>IHD: 1488<br>Stroke: 565<br>Cancer: 3917 | 0.77 (0.66-0.89)<br>0.83 (0.69-1.00)<br>0.83 (0.67-1.04)<br>0.76 (0.56-1.02)<br>0.79 (0.67-0.93)<br>/ Nuts and peanut<br>butter | ≥10 vs. 0 g/d                                                                                     | Age, sex, smoking, history of hypertension and diabetes, body height, BMI, physical activity, education, use of nutritional supplements, postmenopausal HRT (for women), and intakes of energy, alcohol, and vegetables and fruit.                                                        |
| Gopinath, 2015 <sup>14</sup><br>(Australia)             | Blue Mountains Eye<br>Study, 15 yr                         | 2893 M/F<br>aged ≥49 yr                      | Nuts (not specified)                                                     | Self-reported<br>FFQ                  | Total: 1044<br>CVD: 546<br>IHD: 430<br>Stroke: 430                   | 0.93 (0.72-1.08)<br>0.90 (0.73-1.12)<br>0.95 (0.74-1.21)<br>0.88 (0.60-1.29)                                                    | 4.90-100 vs.<br>0.00-0.50 g/d                                                                     | Age, sex, BMI, smoking, alcohol, qualifications, total diet score, self-rated health, walking disability, presence of hypertension and/or diabetes, doctor-diagnosed history of cancer, angina, stroke and/or acute MI.                                                                   |
| Bonaccio, 2015 <sup>15</sup><br>(Italy)                 | Moli-Sani Study, 4.3 yr                                    | 19 386 M/F                                   | Nuts (peanuts,<br>almonds, hazelnut,<br>and walnut)                      | Interview-<br>based FFQ,<br>validated | Total: 334<br>CVD: 104<br>IHD: 39<br>Stroke: 19<br>Cancer: 124       | 0.55 (0.33-0.92)<br>0.71 (0.27-1.84)*<br>0.76 (0.39-1.49)<br>1.01 (0.37-2.76)<br>0.56 (0.25-1.27)*                              | Total<br>mortality:<br>≥8 times/mo<br>vs. never;<br>CHD and<br>stroke:<br>Intake vs. no<br>intake | Age, sex, education, smoking, leisure-time physical activity, BMI, energy intake, Mediterranean diet score without nut, and biomarkers of inflammation including C-reactive protein, platelet count and the neutrophil to lymphocyte ratio.                                               |
| Eslamparast, 2016 <sup>16</sup><br>(Iran)               | Golestan Cohort Study,<br>7.0 yr                           | 50 045 M/F<br>aged ≥40 yr                    | Nuts (peanuts and<br>tree nuts)                                          | Self-reported<br>FFQ, validated       | Total: 3981<br>CVD: 2016<br>Cancer: 887                              | 0.71 (0.58-0.86)<br>0.77 (0.58-1.01)<br>0.62 (0.38-1.01)                                                                        | ≥3 ser/wk<br>vs. never                                                                            | Age, sex, BMI, education, residence, smoking, opium and alcohol consumption, physical activity, wealth score, diabetes, hypertension, total energy intake, main food groups (fish, red meat, chicken, fruit, vegetable, dairy product, egg, and total fiber), magnesium, zinc and copper. |
| Wang, 2016 <sup>17</sup><br>(China)                     | Linxian Nutrition<br>Intervention Trials<br>cohort, 26 yr  | 2445 M/F<br>aged 40-69<br>yr                 | Nuts (peanuts,<br>chestnut, and<br>walnut)                               | Self-reported<br>FFQ                  | Total: 1501<br>HD: 355<br>Stroke: 452                                | 0.99 (0.96-1.02)<br>0.89 (0.82-0.98)<br>0.99 (0.93-1.05)                                                                        | Per 3<br>times/mo                                                                                 | Age, sex, BMI, commune, smoking, alcohol, and season.                                                                                                                                                                                                                                     |

BMI, body mass index; CAD, coronary artery disease; CHD, coronary heart disease; CVD, cardiovascular disease; d, day; EPIC, European Prospective Investigation into Cancer and Nutrition; F, female; FFQ, Food frequency questionnaire; g, grams; HD, heart disease; HS, hemorrhagic stroke; IHD, ischemic heart disease; IS, ischemic stroke; M, male; MI, myocardial infarction; mo, month; PREDIMED, 'PREvención con Dieta MEDiterránea'; SUN, Seguimiento Universidad de Navarra; wk, week; yr, years

\*unpublished data provided by the authors of the primary studies.

†Estimated RR and 95% CI when the lowest category of nut intake was set as the new reference category.

**Supplementary Table 2.** The quality of included studies assessed by the Newcastle Ottawa Scale\*

| Study                                 | Causes of death  | Selection                            |                                    |                           |                                                                          | Comparability                                                   | Outcome               |                                                 |                                  | Total stars                |
|---------------------------------------|------------------|--------------------------------------|------------------------------------|---------------------------|--------------------------------------------------------------------------|-----------------------------------------------------------------|-----------------------|-------------------------------------------------|----------------------------------|----------------------------|
|                                       |                  | Representativeness of exposed cohort | Selection of the nonexposed cohort | Ascertainment of exposure | Demonstration that outcome of interest was not present at start of study | Comparability of cohorts on the basis of the design or analysis | Assessment of outcome | Was follow-up long enough for outcomes to occur | Adequacy of follow-up of cohorts |                            |
| Mann, 1997 <sup>1</sup>               | Total+CHD        | 0                                    | 1                                  | 0                         | 0                                                                        | 2                                                               | 1                     | 1                                               | 0                                | 5                          |
| Fraser, 1997 (AHS-White) <sup>2</sup> | Total+CHD        | 0                                    | 1                                  | 0                         | 1                                                                        | 1                                                               | 1                     | 1                                               | 1                                | 6                          |
| Fraser, 1997 (AHS-Black) <sup>3</sup> | Total            | 0                                    | 1                                  | 0                         | 0                                                                        | 2                                                               | 1                     | 1                                               | 1                                | 6                          |
| Yochum, 2000 <sup>4</sup>             | Stroke           | 1                                    | 1                                  | 0                         | 0                                                                        | 2                                                               | 1                     | 1                                               | 1                                | 7                          |
| Blomhoff, 2006 <sup>5</sup>           | Total+CVD        | 1                                    | 1                                  | 0                         | 0 for total, 1 for CVD                                                   | 1                                                               | 1                     | 1                                               | 0                                | 5 for total<br>6 for CVD   |
| Guasch-Ferré, 2013 <sup>6</sup>       | Total+CVD+Cancer | 0                                    | 1                                  | 1                         | 1 for CVD, 0 for others                                                  | 2                                                               | 1                     | 0                                               | 1                                | 7 for CVD, 6 for others    |
| Bao, 2013 (NHS) <sup>7</sup>          | All 5 causes     | 0                                    | 1                                  | 1                         | 1                                                                        | 2                                                               | 1                     | 1                                               | 1                                | 8                          |
| Bao, 2013 (HPFS) <sup>7</sup>         | All 5 causes     | 0                                    | 1                                  | 1                         | 1                                                                        | 2                                                               | 1                     | 1                                               | 1                                | 8                          |
| Fernandez-Montero, 2014 <sup>8</sup>  | Total            | 0                                    | 1                                  | 1                         | 0                                                                        | 2                                                               | 1                     | 0                                               | 1                                | 6                          |
| Sluik, 2014 <sup>9</sup>              | Total            | 1                                    | 1                                  | 1                         | 0                                                                        | 2                                                               | 1                     | 1                                               | 0                                | 7                          |
| Luu, 2015 (SCCS) <sup>10</sup>        | All 5 causes     | 1                                    | 1                                  | 1                         | 1 for cancer, 0 for others                                               | 2                                                               | 1                     | 1                                               | 0                                | 8 for cancer, 7 for others |
| Luu, 2015 (SMHS) <sup>10</sup>        | All 5 causes     | 1                                    | 1                                  | 1                         | 1 for cancer, 0 for others                                               | 2                                                               | 1                     | 1                                               | 1                                | 9 for cancer, 8 for others |
| Luu, 2015 (SWHS) <sup>10</sup>        | All 5 causes     | 1                                    | 1                                  | 1                         | 0                                                                        | 2                                                               | 1                     | 1                                               | 1                                | 8                          |
| di Giuseppe, 2015 <sup>11</sup>       | Stroke           | 1                                    | 1                                  | 1                         | 1                                                                        | 2                                                               | 1                     | 1                                               | 1                                | 9                          |
| Hshieh, 2015 <sup>12</sup>            | All 5 causes     | 0                                    | 1                                  | 0                         | 0                                                                        | 2                                                               | 1                     | 1                                               | 0                                | 5                          |
| Van den Brandt, 2015 <sup>13</sup>    | All 5 causes     | 1                                    | 1                                  | 1                         | 1                                                                        | 2                                                               | 1                     | 1                                               | 1                                | 9                          |
| Gopinath, 2015 <sup>14</sup>          | All 5 causes     | 1                                    | 1                                  | 1                         | 0                                                                        | 2                                                               | 1                     | 1                                               | 0                                | 7                          |
| Bonaccio, 2015 <sup>15</sup>          | All 5 causes     | 1                                    | 1                                  | 1                         | 1                                                                        | 2                                                               | 1                     | 0                                               | 0                                | 7                          |
| Eslamparast, 2016 <sup>16</sup>       | Total+CVD+Cancer | 1                                    | 1                                  | 1                         | 0                                                                        | 2                                                               | 1                     | 1                                               | 1                                | 8                          |
| Wang, 2016 <sup>17</sup>              | Total+CHD+stroke | 0                                    | 1                                  | 0                         | 0                                                                        | 2                                                               | 1                     | 1                                               | 0                                | 5                          |

AHS, Adventists Health Study; CVD, cardiovascular disease; CHD, coronary heart disease; HPFS, Health Professionals Follow-up Study; NHS, Nurses' Health Study; SCCS, Southern Community Cohort Study; SMHS, Shanghai Men's Health Study; SWHS, Shanghai Women's Health Study.

\*A study can be awarded a maximum of one star for each numbered item within the Selection and Outcome categories and a maximum of two stars for comparability.

**Selection:**

1) Representativeness of exposed cohort

Star assigned if cohort was truly or somewhat representative of the average nut-consumer in the community/population. Note that stars were not assigned where study population was sampled from a special population (i.e. participants of clinical trials or health examinations, nurses, health professionals, Adventists, university graduates).

2) Selection of non-exposed cohort

Star assigned where non-exposed persons were drawn from the same population as the exposed participants.

3) Ascertainment of exposure

Star assigned where diets were assessed using structured interviews, or where articles stated that the self-administered questionnaires had been validated.

4) Demonstration that outcome was not present at start of study:

Star assigned where participants with prevalent cardiovascular disease and/or cancer were excluded. For total mortality, stars assigned where both prevalent cardiovascular disease and cancer were excluded.

**Comparability:**

- 1) Comparability of cohorts on the basis of the design or analysis

One star assigned where aged and smoking was controlled for in analyses.

Second star assigned where other important potential confounders were controlled for in analyses.

**Outcome:**

- 1) Assessment of outcome

Star assigned where outcomes were identified through medical records/ record linkage.

- 2) Was follow-up long enough for outcomes to occur

Star assigned where mean years of follow-up was >5 years

- 3) Adequacy of follow up of cohorts

Star assigned where the follow-up rate was >80%. Note that stars were not assigned where these data were not available.

**Supplementary Table 3.** Subgroup analysis for the association of nut consumption with all-cause mortality, high vs. low consumption

|                                   |     | N* | RR (95% CI)      | P†    | I <sup>2</sup> (%) | P‡          |
|-----------------------------------|-----|----|------------------|-------|--------------------|-------------|
| Geographic areas                  |     |    |                  |       |                    |             |
| USA                               |     | 7  | 0.82 (0.79-0.86) | 0.49  | 0                  | Ref.        |
| Europe                            |     | 5  | 0.70 (0.60-0.81) | 0.26  | 25.0               | 0.07        |
| Asia-Pacific                      |     | 4  | 0.83 (0.77-0.89) | 0.31  | 16.7               | 0.91, 0.11§ |
| Sex of participants               |     |    |                  |       |                    |             |
| Men                               |     | 9  | 0.79 (0.74-0.84) | 0.22  | 25.0               | 0.45        |
| Women                             |     | 9  | 0.81 (0.75-0.88) | 0.05  | 49.2               |             |
| Duration of follow-up             |     |    |                  |       |                    |             |
| ≥10 years                         |     | 8  | 0.84 (0.80-0.87) | 0.73  | 0                  | 0.07        |
| <10 years                         |     | 8  | 0.76 (0.70-0.82) | 0.16  | 33.5               |             |
| Number of deaths                  |     |    |                  |       |                    |             |
| ≥3000                             |     | 8  | 0.82 (0.79-0.85) | 0.49  | 0                  | 0.29        |
| <3000                             |     | 8  | 0.75 (0.67-0.85) | 0.13  | 37.8               |             |
| Range of nut intake <sup>  </sup> |     |    |                  |       |                    |             |
| ≥5 servings/week                  |     | 8  | 0.82 (0.79-0.85) | 0.58  | 0.0                | 0.57        |
| <5 servings/week                  |     | 8  | 0.78 (0.71-0.85) | 0.07  | 46.6               |             |
| Exposure assessment               |     |    |                  |       |                    |             |
| FFQ with validation               |     | 10 | 0.80 (0.76-0.84) | 0.19  | 27.9               | 0.30        |
| FFQ without validation            |     | 6  | 0.84 (0.79-0.91) | 0.38  | 5.4                |             |
| Quality score                     |     |    |                  |       |                    |             |
| ≥ 7                               |     | 9  | 0.81 (0.79-0.84) | 0.47  | 0                  | 0.97        |
| < 7                               |     | 7  | 0.77 (0.69-0.87) | 0.07  | 48.3               |             |
| Type of nuts                      |     |    |                  |       |                    |             |
| Total nuts                        |     | 11 | 0.79 (0.73-0.85) | 0.002 | 63.6               | Ref.        |
| Nuts plus peanut butter           |     | 4  | 0.81 (0.75-0.87) | 0.19  | 36.8               | 0.75        |
| Peanut butter                     |     | 2  | 0.89 (0.80-0.99) | 0.23  | 31.2               | 0.17        |
| Peanuts                           |     | 5  | 0.85 (0.81-0.89) | 0.19  | 34.1               | 0.27        |
| Tree nuts                         |     | 3  | 0.83 (0.77-0.89) | 0.95  | 0                  | 0.53, 0.46# |
| Adjustment                        |     |    |                  |       |                    |             |
| Age                               | Yes | 15 | 0.81 (0.78-0.84) | 0.16  | 27.2               | 0.95        |
|                                   | No  | 1  | 0.82 (0.70-0.96) | NA    | NA                 |             |
| Smoking                           | Yes | 15 | 0.80 (0.77-0.84) | 0.32  | 12.2               | 0.11        |
|                                   | No  | 1  | 0.89 (0.81-0.98) | NA    | NA                 |             |
| Alcohol                           | Yes | 12 | 0.81 (0.78-0.85) | 0.15  | 30.3               | 0.53        |
|                                   | No  | 4  | 0.78 (0.68-0.88) | 0.41  | 0                  |             |
| BMI/weight/height                 | Yes | 13 | 0.81 (0.78-0.85) | 0.11  | 33.6               | 0.76        |
|                                   | No  | 3  | 0.80 (0.71-0.91) | 0.60  | 0                  |             |
| Physical activity                 | Yes | 14 | 0.81 (0.78-0.84) | 0.18  | 25.4               | 0.50        |
|                                   | No  | 2  | 0.87 (0.73-1.04) | 0.28  | 13.8               |             |
| Education                         | Yes | 8  | 0.80 (0.75-0.85) | 0.11  | 41.1               | 0.77        |
|                                   | No  | 8  | 0.82 (0.78-0.86) | 0.41  | 3.2                |             |
| Diabetes                          | Yes | 12 | 0.81 (0.78-0.84) | 0.31  | 13.6               | 0.36        |
|                                   | No  | 4  | 0.78 (0.64-0.95) | 0.15  | 43.8               |             |
| Hypertension                      | Yes | 11 | 0.81 (0.77-0.84) | 0.24  | 21.3               | 0.40        |
|                                   | No  | 5  | 0.82 (0.73-0.92) | 0.24  | 27.7               |             |
| Dyslipidemia                      | Yes | 8  | 0.82 (0.78-0.86) | 0.15  | 34.6               | 0.26        |
|                                   | No  | 8  | 0.78 (0.73-0.84) | 0.45  | 0                  |             |
| Energy intake                     | Yes | 12 | 0.81 (0.77-0.84) | 0.13  | 33.1               | 0.72        |
|                                   | No  | 4  | 0.83 (0.75-0.93) | 0.45  | 0                  |             |
| Vitamin supplements               | Yes | 7  | 0.83 (0.80-0.85) | 0.64  | 0                  | 0.13        |
|                                   | No  | 9  | 0.75 (0.67-0.83) | 0.16  | 32.7               |             |
| Fruit/vegetables                  | Yes | 11 | 0.82 (0.79-0.84) | 0.37  | 7.6                | 0.75        |
|                                   | No  | 5  | 0.71 (0.55-0.91) | 0.08  | 51.6               |             |
| Red/processed meat                | Yes | 10 | 0.82 (0.79-0.85) | 0.33  | 11.8               | 0.48        |
|                                   | No  | 6  | 0.75 (0.64-0.89) | 0.14  | 40.0               |             |
| Fish/seafood                      | Yes | 7  | 0.81 (0.77-0.86) | 0.17  | 34.1               | 0.87        |
|                                   | No  | 9  | 0.81 (0.76-0.86) | 0.26  | 20.8               |             |
| Dietary fiber                     | Yes | 2  | 0.74 (0.65-0.84) | 0.60  | 0                  | 0.17        |
|                                   | No  | 14 | 0.82 (0.79-0.85) | 0.22  | 21.2               |             |
| Whole grain                       | Yes | 1  | 0.89 (0.81-0.98) | NA    | NA                 | 0.11        |
|                                   | No  | 15 | 0.80 (0.77-0.84) | 0.32  | 12.2               |             |

BMI, body mass index; NA, not applicable

\*Number of studies

†P value for heterogeneity among studies

‡P value for differences between groups

§Asia-Pacific vs. Europe

<sup>||</sup>Range between mean/median of the highest and lowest categories of nut intake

#Tree nuts vs. peanuts

**Supplementary Table 4.** Subgroup analysis for the associations of nut consumption with cardiovascular disease and cancer mortality, high vs. low consumption

|                                   | CVD mortality |    |                  |      |                    |             | Cancer mortality |                  |      |                    |             |
|-----------------------------------|---------------|----|------------------|------|--------------------|-------------|------------------|------------------|------|--------------------|-------------|
|                                   |               | N* | RR (95% CI)      | P†   | I <sup>2</sup> (%) | P‡          | N*               | RR (95% CI)      | P†   | I <sup>2</sup> (%) | P‡          |
| Geographic areas                  |               |    |                  |      |                    |             |                  |                  |      |                    |             |
| USA                               |               | 6  | 0.73 (0.68-0.79) | 0.77 | 0                  | Ref.        | 4                | 0.87 (0.79-0.94) | 0.38 | 2.1                | Ref.        |
| Europe                            |               | 6  | 0.65 (0.48-0.88) | 0.15 | 38.4               | 0.75        | 4                | 0.76 (0.66-0.89) | 0.63 | 0                  | 0.21        |
| Asia-Pacific                      |               | 4  | 0.78 (0.71-0.86) | 0.47 | 0                  | 0.31, 0.54§ | 3                | 0.93 (0.82-1.07) | 0.22 | 33.9               | 0.28, 0.07§ |
| Sex of participants               |               |    |                  |      |                    |             |                  |                  |      |                    |             |
| Men                               |               | 7  | 0.77 (0.70-0.84) | 0.35 | 10.6               | 0.59        | 5                | 0.85 (0.75-0.96) | 0.23 | 29.5               | 0.33        |
| Women                             |               | 7  | 0.74 (0.68-0.81) | 0.65 | 0                  |             | 4                | 0.93 (0.84-1.04) | 0.32 | 14.3               |             |
| Duration of follow-up             |               |    |                  |      |                    |             |                  |                  |      |                    |             |
| ≥10 years                         |               | 8  | 0.76 (0.71-0.82) | 0.43 | 0                  | 0.47        | 4                | 0.89 (0.82-0.97) | 0.24 | 28.9               | 0.33        |
| <10 years                         |               | 8  | 0.73 (0.66-0.80) | 0.44 | 0                  |             | 7                | 0.80 (0.68-0.93) | 0.20 | 29.9               |             |
| Number of deaths                  |               |    |                  |      |                    |             |                  |                  |      |                    |             |
| ≥1500                             |               | 6  | 0.75 (0.70-0.81) | 0.79 | 0                  | 0.81        | 5                | 0.87 (0.81-0.95) | 0.21 | 31.2               | 0.54        |
| <1500                             |               | 10 | 0.73 (0.65-0.82) | 0.22 | 24.3               |             | 6                | 0.76 (0.59-0.96) | 0.17 | 35.1               |             |
| Range of nut intake <sup>  </sup> |               |    |                  |      |                    |             |                  |                  |      |                    |             |
| ≥ 5 servings/week                 |               | 7  | 0.73 (0.68-0.79) | 0.83 | 0                  | 0.36        | 4                | 0.87 (0.79-0.94) | 0.38 | 2.1                | 0.96        |
| < 5 servings/week                 |               | 9  | 0.76 (0.69-0.85) | 0.22 | 25.3               |             | 7                | 0.85 (0.74-0.97) | 0.11 | 41.8               |             |
| Exposure assessment               |               |    |                  |      |                    |             |                  |                  |      |                    |             |
| FFQ with validation               |               | 11 | 0.75 (0.70-0.80) | 0.49 | 0                  | 0.81        | 10               | 0.87 (0.80-0.94) | 0.18 | 29.4               | 0.44        |
| FFQ without validation            |               | 5  | 0.76 (0.66-0.87) | 0.30 | 18.0               |             | 1                | 0.64 (0.32-1.29) | NA   | NA                 |             |
| Quality score                     |               |    |                  |      |                    |             |                  |                  |      |                    |             |
| ≥ 7                               |               | 11 | 0.76 (0.72-0.81) | 0.49 | 0                  | 0.23        | 8                | 0.88 (0.81-0.95) | 0.17 | 32.4               | 0.15        |
| < 7                               |               | 5  | 0.69 (0.60-0.79) | 0.51 | 0                  |             | 3                | 0.65 (0.45-0.93) | 0.79 | 0                  |             |
| Type of nuts                      |               |    |                  |      |                    |             |                  |                  |      |                    |             |
| Total nuts                        |               | 10 | 0.75 (0.68-0.84) | 0.16 | 31.2               | Ref.        | 6                | 0.85 (0.74-0.96) | 0.27 | 21.5               | Ref.        |
| Nuts plus peanut butter           |               | 4  | 0.75 (0.68-0.83) | 0.66 | 0                  | 0.72        | 3                | 0.79 (0.70-0.88) | 0.85 | 0                  | 0.24        |
| Peanut butter                     |               | 1  | 0.99 (0.80-1.23) | NA   | NA                 | 0.11        | 1                | 0.98 (0.82-1.17) | NA   | NA                 | 0.33        |
| Peanuts                           |               | 5  | 0.78 (0.73-0.85) | 0.30 | 18.0               | 0.73        | 5                | 0.93 (0.87-0.99) | 0.30 | 18.5               | 0.29        |
| Tree nuts                         |               | 3  | 0.81 (0.74-0.89) | 0.62 | 0                  | 0.42, 0.53# | 3                | 0.82 (0.76-0.90) | 0.99 | 0                  | 0.45, 0.06# |
| Adjustment                        |               |    |                  |      |                    |             |                  |                  |      |                    |             |
| Age                               | Yes           | 15 | 0.75 (0.71-0.80) | 0.56 | 0                  | 0.20        | 11               | 0.87 (0.80-0.93) | 0.20 | 26.0               | NA          |
|                                   | No            | 1  | 0.61 (0.45-0.83) | NA   | NA                 |             | 0                | NA               | NA   | NA                 |             |
| Smoking                           | Yes           | 15 | 0.75 (0.71-0.80) | 0.43 | 1.5                | 0.68        | 11               | 0.87 (0.80-0.93) | 0.20 | 26.0               | NA          |
|                                   | No            | 1  | 0.72 (0.59-0.87) | NA   | NA                 |             | 0                | NA               | NA   | NA                 |             |
| Alcohol                           | Yes           | 13 | 0.75 (0.71-0.80) | 0.41 | 3.2                | 0.33        | 10               | 0.87 (0.81-0.94) | 0.19 | 27.1               | 0.34        |
|                                   | No            | 3  | 0.65 (0.50-0.85) | 0.62 | 0                  |             | 1                | 0.56 (0.25-1.26) | NA   | NA                 |             |
| BMI/weight/height                 | Yes           | 14 | 0.75 (0.71-0.80) | 0.49 | 0                  | 0.32        | 11               | 0.87 (0.80-0.93) | 0.20 | 26.0               | NA          |
|                                   | No            | 2  | 0.65 (0.49-0.86) | 0.34 | 0                  |             | 0                | NA               | NA   | NA                 |             |
| Physical activity                 | Yes           | 14 | 0.74 (0.70-0.78) | 0.60 | 0                  | 0.09        | 11               | 0.87 (0.80-0.93) | 0.20 | 26.0               | NA          |
|                                   | No            | 2  | 0.90 (0.73-1.10) | 0.92 | 0                  |             | 0                | NA               | NA   | NA                 |             |
| Education                         | Yes           | 9  | 0.74 (0.69-0.80) | 0.62 | 0                  | 0.78        | 7                | 0.84 (0.74-0.95) | 0.07 | 48.6               | 0.64        |
|                                   | No            | 7  | 0.76 (0.67-0.85) | 0.23 | 25.5               |             | 4                | 0.89 (0.81-0.98) | 0.43 | 0                  |             |
| Diabetes                          | Yes           | 13 | 0.75 (0.70-0.80) | 0.30 | 14.3               | 0.77        | 10               | 0.87 (0.81-0.94) | 0.19 | 27.1               | 0.34        |
|                                   | No            | 3  | 0.73 (0.61-0.87) | 0.86 | 0                  |             | 1                | 0.56 (0.25-1.26) | NA   | NA                 |             |
| Hypertension                      | Yes           | 12 | 0.76 (0.71-0.81) | 0.35 | 9.5                | 0.34        | 10               | 0.87 (0.81-0.94) | 0.19 | 27.1               | 0.34        |
|                                   | No            | 4  | 0.70 (0.60-0.81) | 0.74 | 0                  |             | 1                | 0.56 (0.25-1.26) | NA   | NA                 |             |
| Dyslipidemia                      | Yes           | 8  | 0.73 (0.68-0.79) | 0.34 | 11.3               | 0.35        | 7                | 0.90 (0.83-0.97) | 0.28 | 19.1               | 0.07        |
|                                   | No            | 8  | 0.78 (0.71-0.85) | 0.59 | 0                  |             | 4                | 0.76 (0.65-0.88) | 0.65 | 0                  |             |
| Energy intake                     | Yes           | 13 | 0.74 (0.70-0.79) | 0.65 | 0                  | 0.46        | 11               | 0.87 (0.80-0.93) | 0.20 | 26.0               | NA          |
|                                   | No            | 3  | 0.77 (0.58-1.03) | 0.12 | 52.8               |             | 0                | NA               | NA   | NA                 |             |
| Vitamin supplements               | Yes           | 7  | 0.75 (0.71-0.80) | 0.83 | 0                  | 0.84        | 6                | 0.89 (0.83-0.96) | 0.22 | 29.2               | 0.04        |
|                                   | No            | 9  | 0.71 (0.60-0.84) | 30.5 | 0.17               |             | 5                | 0.63 (0.48-0.83) | 0.96 | 0                  |             |
| Fruit/vegetables                  | Yes           | 12 | 0.74 (0.70-0.79) | 0.65 | 0                  | 0.25        | 10               | 0.87 (0.81-0.94) | 0.19 | 27.1               | 0.34        |
|                                   | No            | 4  | 0.77 (0.57-1.06) | 0.24 | 28.9               |             | 1                | 0.56 (0.25-1.26) | NA   | NA                 |             |
| Red/processed meat                | Yes           | 11 | 0.73 (0.69-0.78) | 0.71 | 0                  | 0.10        | 8                | 0.88 (0.81-0.96) | 0.16 | 33.3               | 0.23        |
|                                   | No            | 5  | 0.83 (0.72-0.96) | 0.38 | 5.3                |             | 3                | 0.78 (0.67-0.92) | 0.70 | 0                  |             |
| Fish/seafood                      | Yes           | 8  | 0.72 (0.67-0.78) | 0.56 | 0                  | 0.18        | 5                | 0.86 (0.74-0.99) | 0.07 | 54.6               | 0.76        |
|                                   | No            | 8  | 0.78 (0.72-0.85) | 0.48 | 0                  |             | 6                | 0.86 (0.79-0.93) | 0.51 | 0                  |             |
| Dietary fiber                     | Yes           | 1  | 0.77 (0.58-1.02) | NA   | NA                 | 0.85        | 1                | 0.62 (0.38-1.01) | NA   | NA                 | 0.22        |
|                                   | No            | 15 | 0.75 (0.71-0.79) | 0.42 | 2.4                |             | 10               | 0.87 (0.81-0.94) | 0.24 | 22.2               |             |
| Whole grain                       | Yes           | 2  | 0.66 (0.40-1.09) | 0.27 | 17.2               | 0.57        | 0                | NA               | NA   | NA                 | NA          |
|                                   | No            | 14 | 0.75 (0.71-0.80) | 0.46 | 0                  |             | 11               | 0.87 (0.80-0.93) | 0.20 | 26.0               |             |

BMI, body mass index; CVD, cardiovascular disease; NA, not applicable

\*Number of studies

†P value for heterogeneity among studies

‡P value for differences between groups

§Asia-Pacific vs. Europe

<sup>||</sup>Range between mean/median of the highest and lowest categories of nut intake.

#Tree nuts vs. peanuts



**Supplementary Table 5.** Subgroup analysis for the associations of nut consumption with coronary heart disease and stroke mortality, high vs. low consumption

|                                         | CHD mortality |                  |                  |                    |             | Stroke mortality |                  |                  |                    |             |      |
|-----------------------------------------|---------------|------------------|------------------|--------------------|-------------|------------------|------------------|------------------|--------------------|-------------|------|
|                                         | N*            | RR (95% CI)      | P†               | I <sup>2</sup> (%) | P‡          | N*               | RR (95% CI)      | P†               | I <sup>2</sup> (%) | P‡          |      |
| <b>Geographic areas</b>                 |               |                  |                  |                    |             |                  |                  |                  |                    |             |      |
| USA                                     | 6             | 0.69 (0.63-0.76) | 0.73             | 0                  | Ref.        | 5                | 0.87 (0.74-1.02) | 0.73             | 0                  | Ref.        |      |
| Europe                                  | 4             | 0.81 (0.66-0.99) | 0.40             | 0                  | 0.16        | 4                | 0.73 (0.55-0.96) | 0.44             | 0                  | 0.30        |      |
| China                                   | 3             | 0.79 (0.60-1.03) | 0.12             | 53.1               | 0.14, 0.98§ | 3                | 0.79 (0.67-0.93) | 0.78             | 0                  | 0.42, 0.64§ |      |
| <b>Sex of participants</b>              |               |                  |                  |                    |             |                  |                  |                  |                    |             |      |
| Men                                     | 6             | 0.74 (0.67-0.83) | 0.68             | 0                  | 0.65        | 5                | 0.85 (0.73-0.99) | 0.58             | 0                  | 0.70        |      |
| Women                                   | 6             | 0.71 (0.61-0.81) | 0.36             | 0                  |             | 5                | 0.81 (0.69-0.97) | 0.47             | 0                  |             |      |
| <b>Duration of follow-up</b>            |               |                  |                  |                    |             |                  |                  |                  |                    |             |      |
| ≥10 years                               | 8             | 0.74 (0.67-0.82) | 0.28             | 18.7               | 0.62        | 6                | 0.81 (0.71-0.92) | 0.72             | 0                  | 0.78        |      |
| <10 years                               | 5             | 0.71 (0.57-0.87) | 0.29             | 19.6               |             | 6                | 0.83 (0.70-0.99) | 0.67             | 0                  |             |      |
| <b>Number of deaths</b>                 |               |                  |                  |                    |             |                  |                  |                  |                    |             |      |
| ≥500                                    | 5             | 0.72 (0.65-0.79) | 0.50             | 0                  | 0.51        | 4                | 0.80 (0.69-0.93) | 0.47             | 0                  | 0.73        |      |
| <500                                    | 8             | 0.75 (0.63-0.90) | 0.19             | 29.7               |             | 8                | 0.83 (0.72-0.97) | 0.77             | 0                  |             |      |
| <b>Range of nut intake<sup>  </sup></b> |               |                  |                  |                    |             |                  |                  |                  |                    |             |      |
| ≥5 servings/week                        | 7             | 0.69 (0.63-0.77) | 0.77             | 0                  | 0.09        | 4                | 0.89 (0.75-1.05) | 0.65             | 0                  | 0.23        |      |
| <5 servings/week                        | 6             | 0.79 (0.67-0.95) | 0.21             | 30.2               |             | 8                | 0.77 (0.67-0.88) | 0.84             | 0                  |             |      |
| <b>Exposure assessment</b>              |               |                  |                  |                    |             |                  |                  |                  |                    |             |      |
| FFQ with validation                     | 8             | 0.71 (0.65-0.79) | 0.41             | 0                  | 0.38        | 9                | 0.80 (0.71-0.91) | 0.63             | 0                  | 0.64        |      |
| FFQ without validation                  | 5             | 0.78 (0.65-0.93) | 0.22             | 30.5               |             | 3                | 0.85 (0.69-1.05) | 0.85             | 0                  |             |      |
| <b>Quality score</b>                    |               |                  |                  |                    |             |                  |                  |                  |                    |             |      |
| ≥7                                      | 9             | 0.74 (0.66-0.83) | 0.16             | 31.8               | 0.73        | 11               | 0.81 (0.72-0.90) | 0.77             | 0                  | 0.63        |      |
| <7                                      | 4             | 0.71 (0.60-0.84) | 0.57             | 0                  |             | 1                | 0.87 (0.66-1.15) | NA               | NA                 |             |      |
| <b>Type of nuts</b>                     |               |                  |                  |                    |             |                  |                  |                  |                    |             |      |
| Total nuts                              | 7             | 0.75 (0.67-0.84) | 0.22             | 26.8               | Ref.        | 7                | 0.89 (0.77-1.02) | 0.52             | 0                  | Ref.        |      |
| Nuts plus peanut butter                 | 4             | 0.73 (0.63-0.85) | 0.28             | 22.5               | 0.80        | 3                | 0.84 (0.70-1.01) | 0.66             | 0                  | 0.67        |      |
| Peanut butter                           | 1             | 0.97 (0.75-1.25) | NA               | NA                 | 0.15        | 1                | 0.86 (0.60-1.23) | NA               | NA                 | 0.89        |      |
| Peanuts                                 | 5             | 0.76 (0.69-0.82) | 0.65             | 0                  | 0.88        | 5                | 0.83 (0.71-0.97) | 0.12             | 46.2               | 0.59        |      |
| Tree nuts                               | 3             | 0.79 (0.69-0.82) | 0.25             | 27.5               | 0.65, 0.70# | 3                | 0.93 (0.77-1.13) | 0.44             | 0                  | 0.69, 0.44# |      |
| <b>Adjustment</b>                       |               |                  |                  |                    |             |                  |                  |                  |                    |             |      |
| Age                                     | Yes           | 12               | 0.74 (0.68-0.81) | 0.33               | 12.0        | 0.27             | 12               | 0.82 (0.73-0.91) | 0.82               | 0           | NA   |
|                                         | No            | 1                | 0.61 (0.45-0.83) | NA                 | NA          |                  | 0                | NA               | NA                 | NA          |      |
| Smoking                                 | Yes           | 12               | 0.74 (0.67-0.81) | 0.24               | 20.9        | 0.83             | 12               | 0.82 (0.73-0.91) | 0.82               | 0           | NA   |
|                                         | No            | 1                | 0.71 (0.55-0.91) | NA                 | NA          |                  | 0                | NA               | NA                 | NA          |      |
| Alcohol                                 | Yes           | 10               | 0.74 (0.67-0.82) | 0.20               | 26.6        | 0.51             | 11               | 0.81 (0.73-0.90) | 0.77               | 0           | 0.68 |
|                                         | No            | 3                | 0.66 (0.51-0.86) | 0.58               | 0           |                  | 1                | 1.01 (0.37-2.76) | NA                 | NA          |      |
| BMI/weight/height                       | Yes           | 11               | 0.74 (0.67-0.82) | 0.27               | 18.5        | 0.45             | 12               | 0.82 (0.73-0.91) | 0.82               | 0           | NA   |
|                                         | No            | 2                | 0.65 (0.49-0.86) | 0.34               | 0           |                  | 0                | NA               | NA                 | NA          |      |
| Physical activity                       | Yes           | 11               | 0.71 (0.65-0.77) | 0.54               | 0           | 0.05             | 11               | 0.81 (0.73-0.90) | 0.77               | 0           | 0.69 |
|                                         | No            | 2                | 0.94 (0.75-1.18) | 0.81               | 0           |                  | 1                | 0.88 (0.60-1.29) | NA                 | NA          |      |
| Education                               | Yes           | 7                | 0.71 (0.62-0.81) | 0.30               | 16.6        | 0.52             | 8                | 0.77 (0.67-0.89) | 0.79               | 0           | 0.28 |
|                                         | No            | 6                | 0.76 (0.66-0.86) | 0.27               | 22.2        |                  | 4                | 0.88 (0.75-1.03) | 0.68               | 0           |      |
| Diabetes                                | Yes           | 10               | 0.73 (0.65-0.82) | 0.14               | 34.1        | 0.97             | 11               | 0.81 (0.73-0.90) | 0.77               | 0           | 0.68 |
|                                         | No            | 3                | 0.73 (0.59-0.91) | 0.85               | 0           |                  | 1                | 1.01 (0.37-2.76) | 0.97               | 0           |      |
| Hypertension                            | Yes           | 9                | 0.75 (0.66-0.84) | 0.15               | 34.1        | 0.50             | 10               | 0.82 (0.73-0.91) | 0.70               | 0           | 0.90 |
|                                         | No            | 4                | 0.69 (0.57-0.82) | 0.75               | 0           |                  | 2                | 0.79 (0.48-1.30) | 0.58               | 0           |      |
| Dyslipidemia                            | Yes           | 9                | 0.72 (0.66-0.78) | 0.45               | 0           | 0.36             | 9                | 0.80 (0.71-0.90) | 0.64               | 0           | 0.46 |
|                                         | No            | 4                | 0.79 (0.61-1.02) | 0.17               | 39.7        |                  | 3                | 0.88 (0.71-1.10) | 0.96               | 0           |      |
| Energy intake                           | Yes           | 10               | 0.72 (0.66-0.78) | 0.55               | 0           | 0.36             | 11               | 0.81 (0.73-0.90) | 0.77               | 0           | 0.69 |
|                                         | No            | 3                | 0.79 (0.57-1.09) | 0.08               | 59.6        |                  | 1                | 0.88 (0.60-1.29) | NA                 | NA          |      |
| Vitamin supplements                     | Yes           | 8                | 0.72 (0.66-0.79) | 0.60               | 0           | 0.45             | 6                | 0.81 (0.72-0.92) | 0.68               | 0           | 0.89 |
|                                         | No            | 5                | 0.75 (0.56-1.01) | 0.10               | 48.0        |                  | 6                | 0.83 (0.68-1.01) | 0.61               | 0           |      |
| Fruit/vegetables                        | Yes           | 10               | 0.71 (0.65-0.77) | 0.45               | 0           | 0.05             | 9                | 0.81 (0.73-0.91) | 0.62               | 0           | 0.81 |
|                                         | No            | 3                | 0.92 (0.74-1.14) | 0.82               | 0           |                  | 3                | 0.85 (0.62-1.15) | 0.81               | 0           |      |
| Red/processed meat                      | Yes           | 9                | 0.69 (0.63-0.76) | 0.59               | 0           | 0.03             | 8                | 0.82 (0.73-0.92) | 0.53               | 0           | 0.86 |
|                                         | No            | 4                | 0.87 (0.75-1.02) | 0.84               | 0           |                  | 4                | 0.80 (0.65-0.99) | 0.88               | 0           |      |
| Fish/seafood                            | Yes           | 6                | 0.66 (0.58-0.75) | 0.45               | 0           | 0.06             | 6                | 0.77 (0.66-0.90) | 0.60               | 0           | 0.39 |
|                                         | No            | 7                | 0.78 (0.71-0.86) | 0.57               | 0           |                  | 6                | 0.85 (0.74-0.98) | 0.81               | 0           |      |
| Dietary fiber                           | Yes           | 0                | NA               | NA                 | NA          | NA               | 1                | 0.73 (0.41-1.29) | NA                 | NA          | 0.71 |
|                                         | No            | 13               | 0.73 (0.67-0.80) | 0.30               | 14.2        |                  | 11               | 0.82 (0.74-0.91) | 0.76               | 0           |      |
| Whole grain                             | Yes           | 1                | 0.71 (0.55-0.91) | NA                 | NA          | 0.83             | 2                | 0.63 (0.34-1.18) | 0.29               | 9.5         | 0.43 |
|                                         | No            | 12               | 0.74 (0.67-0.81) | 0.24               | 20.9        |                  | 10               | 0.82 (0.74-0.92) | 0.84               | 0           |      |

BMI, body mass index; CHD, coronary heart disease; NA, not applicable.

\*Number of studies.

†P value for heterogeneity among studies

‡P value for differences between groups

§Asia-Pacific vs. Europe.

<sup>||</sup>Range between mean/median of the highest and lowest categories of nut intake

#Tree nuts vs. peanuts

**Supplementary Table 6.** Regression coefficients between frequency of nut consumption and background risk factors

| Study                        | Nut consumption (serving/wk)         |               |                     |                         |                                    |
|------------------------------|--------------------------------------|---------------|---------------------|-------------------------|------------------------------------|
|                              | Body Mass Index (kg/m <sup>2</sup> ) | Nonsmoker (%) | Fruits (servings/d) | Vegetables (servings/d) | Fruits and vegetables (servings/d) |
| Guasch-Ferré, 2013           | -0.3000002                           | 1.25          | 0.1999999           | 0.1                     | 0.3                                |
| Bao (NHS), 2013              | -0.2284412                           | 0.383591      | 0.0927986           | 0.0762078               | 0.1690065                          |
| Bao (HPFS), 2013             | -0.0787603                           | 0.0129444     | 0.101185            | 0.1028259               | 0.2040108                          |
| Fernandez-Montero, 2014      | -0.013312                            | 1.861329      | 0.5835995           | 0.4421959               | 1.025796                           |
| Luu (SCCS), 2015             | -0.2744174                           | -0.8596053    | 0.2292825           | 0.1284098               | 0.3576923                          |
| Luu (SWHS+SMHS), 2015        | 0.8367419                            | 2.910357      | 0.4631369           | 1.667956                | 2.131093                           |
| Hshien-2015                  | -0.0884664                           | -0.0173318    | NA                  | NA                      | 0.2206113                          |
| van den Brandt (men), 2015   | 0.0299128                            | -0.3513159    | 0.0358321           | -0.0090018              | 0.0268303                          |
| van den Brandt (women), 2015 | -0.1628382                           | -2.224359     | 0.0492473           | 0.0567429               | 0.1059902                          |
| Bonaccio, 2015               | NA                                   | 1.063461      | NA                  | NA                      | NA                                 |
| Eslamparast,2016             | 0.4580643                            | -1.665807     | 0.4954839           | 0.2374194               | 0.7329033                          |
| <b>Median</b>                | <b>-0.08</b>                         | <b>0.01</b>   | <b>0.20</b>         | <b>0.10</b>             | <b>0.26</b>                        |

**Supplementary Table 7.** Sensitivity analyses of nut consumption (high vs. low) and risk of all-cause mortality by regression coefficients between nut consumption and background risk factors

|                                                     | <i>N</i> * | RR (95% CI)      | <i>P</i> † | <i>I</i> <sup>2</sup> (%) | <i>P</i> ‡ |
|-----------------------------------------------------|------------|------------------|------------|---------------------------|------------|
| Regression coefficient for BMI                      |            |                  |            |                           |            |
| ≥ median                                            | 5          | 0.80 (0.75-0.86) | 0.20       | 33.9                      | 0.70       |
| < median                                            | 5          | 0.80 (0.75-0.85) | 0.33       | 13.7                      |            |
| Regression coefficient for percentage of nonsmokers |            |                  |            |                           |            |
| ≥ median                                            | 7          | 0.80 (0.74-0.87) | 0.08       | 48.7                      | 0.21       |
| < median                                            | 4          | 0.77 (0.73-0.82) | 0.90       | 0                         |            |
| Regression coefficient for fruits                   |            |                  |            |                           |            |
| ≥ median                                            | 5          | 0.79 (0.72-0.86) | 0.12       | 48.2                      | 0.80       |
| < median                                            | 4          | 0.81 (0.76-0.86) | 0.34       | 11.1                      |            |
| Regression coefficient for vegetables               |            |                  |            |                           |            |
| ≥ median                                            | 6          | 0.80 (0.76-0.85) | 0.20       | 33.2                      | 0.97       |
| < median                                            | 3          | 0.79 (0.70-0.87) | 0.22       | 32.0                      |            |
| Regression coefficient for fruits and vegetables    |            |                  |            |                           |            |
| ≥ median                                            | 6          | 0.76 (0.69-0.84) | 0.07       | 54.7                      | 0.63       |
| < median                                            | 4          | 0.81 (0.77-0.88) | 0.78       | 0                         |            |

\*Number of studies

†*P* value for heterogeneity among studies

‡*P* value for differences between groups

## References

1. J. I. Mann, P. N. Appleby, T. J. Key and M. Thorogood, Dietary determinants of ischaemic heart disease in health conscious individuals, *Heart*, 1997, **78**, 450-455.
2. G. E. Fraser and D. J. Shavlik, Risk factors for all-cause and coronary heart disease mortality in the oldest-old. The Adventist Health Study, *Arch Intern Med*, 1997, **157**, 2249-2258.
3. G. E. Fraser, D. Sumbureru, P. Pribis, R. L. Neil and M. A. Frankson, Association among health habits, risk factors, and all-cause mortality in a black California population, *Epidemiology*, 1997, **8**, 168-174.
4. L. A. Yochum, A. R. Folsom and L. H. Kushi, Intake of antioxidant vitamins and risk of death from stroke in postmenopausal women, *Am J Clin Nutr*, 2000, **72**, 476-483.
5. R. Blomhoff, M. H. Carlsen, L. F. Andersen and D. R. Jacobs, Jr., Health benefits of nuts: potential role of antioxidants, *Br J Nutr*, 2006, **96 Suppl 2**, S52-60.
6. M. Guasch-Ferre, M. Bullo, M. A. Martinez-Gonzalez, E. Ros, D. Corella, R. Estruch, M. Fito, F. Aros, J. Warnberg, M. Fiol, J. Lapetra, E. Vinyoles, R. M. Lamuela-Raventos, L. Serra-Majem, X. Pinto, V. Ruiz-Gutierrez, J. Basora and J. Salas-Salvado, Frequency of nut consumption and mortality risk in the PREDIMED nutrition intervention trial, *BMC Med*, 2013, **11**, 164.
7. Y. Bao, J. Han, F. B. Hu, E. L. Giovannucci, M. J. Stampfer, W. C. Willett and C. S. Fuchs, Association of nut consumption with total and cause-specific mortality, *N Engl J Med*, 2013, **369**, 2001-2011.
8. A. Fernandez-Montero, M. Bes-Rastrollo, M. T. Barrio-Lopez, L. Fuente-Arrillaga Cde, J. Salas-Salvado, L. Moreno-Galarraga and M. A. Martinez-Gonzalez, Nut consumption and 5-y all-cause mortality in a Mediterranean cohort: the SUN project, *Nutrition*, 2014, **30**, 1022-1027.
9. D. Sluik, H. Boeing, K. Li, R. Kaaks, N. F. Johnsen, A. Tjonneland, L. Arriola, A. Barricarte, G. Masala, S. Grioni, R. Tumino, F. Ricceri, A. Mattiello, A. M. Spijkerman, A. D. van der, I. Sluijs, P. W. Franks, P. M. Nilsson, M. Orho-Melander, E. Fharm, O. Rolandsson, E. Riboli, D. Romaguera, E. Weiderpass, E. Sanchez-Cantalejo and U. Nothlings, Lifestyle factors and mortality risk in individuals with diabetes mellitus: are the associations different from those in individuals without diabetes?, *Diabetologia*, 2014, **57**, 63-72.
10. H. N. Luu, W. J. Blot, Y. B. Xiang, H. Cai, M. K. Hargreaves, H. Li, G. Yang, L. Signorello, Y. T. Gao, W. Zheng and X. O. Shu, Prospective evaluation of the association of nut/peanut consumption with total and cause-specific mortality, *JAMA Intern Med*, 2015, **175**, 755-766.
11. R. di Giuseppe, M. K. Fjeld, J. Dierkes, D. Theoflylaktopoulou, M. Arregui, H. Boeing and C. Weikert, The association between nut consumption and the risk of total and ischemic stroke in a German cohort study, *Eur J Clin Nutr*, 2015, **69**, 431-435.
12. T. T. Hshieh, A. B. Petrone, J. M. Gaziano and L. Djousse, Nut consumption and risk of mortality in the Physicians' Health Study, *Am J Clin Nutr*, 2015, **101**, 407-412.
13. P. A. van den Brandt and L. J. Schouten, Relationship of tree nut, peanut and peanut butter intake with total and cause-specific mortality: a cohort study and meta-analysis, *Int J Epidemiol*, 2015, **44**, 1038-1049.
14. B. Gopinath, V. M. Flood, G. Burlutsky and P. Mitchell, Consumption of nuts and risk of total and cause-specific mortality over 15 years, *Nutr Metab Cardiovasc Dis*, 2015, **25**, 1125-1131.
15. M. Bonaccio, A. Di Castelnuovo, A. De Curtis, S. Costanzo, F. Bracone, M. Persichillo, M. B. Donati, G. de Gaetano, L. Iacoviello and i. Moli-sani Project, Nut consumption is inversely associated with both cancer and total mortality in a Mediterranean population: prospective results from the Moli-sani study,

*Br J Nutr*, 2015, **114**, 804-811.

16. T. Eslamparast, M. Sharafkhah, H. Poustchi, M. Hashemian, S. M. Dawsey, N. D. Freedman, P. Boffetta, C. C. Abnet, A. Etemadi, A. Pourshams, A. F. Malekshah, F. Islami, F. Kamangar, S. Merat, P. Brennan, A. Hekmatdoost and R. Malekzadeh, Nut consumption and total and cause-specific mortality: results from the Golestan Cohort Study, *Int J Epidemiol*, 2016, **46**, 75-85.
17. J. B. Wang, J. H. Fan, S. M. Dawsey, R. Sinha, N. D. Freedman, P. R. Taylor, Y. L. Qiao and C. C. Abnet, Dietary components and risk of total, cancer and cardiovascular disease mortality in the Linxian Nutrition Intervention Trials cohort in China, *Sci Rep*, 2016, **6**, 22619.
